## **Micromanagment of stem cell proliferation by the *Drosophila* testis stem cell niche**

Olga A. Puretskaia<sup>1#</sup>, Eugene A. Albert<sup>1#</sup>, Nadezhda V. Terekhanova<sup>2,3,4</sup>, Christian Bökel<sup>1§</sup>

<sup>1</sup>Centre for Regenerative Therapies Dresden, Technical University Dresden, Fetscherstr. 105, 01307 Dresden, Germany

<sup>2</sup> Sector for Molecular Evolution, Institute for Information Transmission Problems of the RAS (Kharkevich Institute), Moscow 127994, Russia

<sup>3</sup>N. K. Koltsov Institute of Developmental Biology of the RAS, Moscow 119334, Russia

<sup>4</sup>Laboratory of Molecular Genetics, Russian Federal Research Institute of Fisheries and Oceanography, Moscow 107140, Russia

§please address correspondence to [christian.boekel@tu-dresden.de](mailto:christian.boekel@tu-dresden.de)

# These authors contributed equally to this work

### **Running Title:**

Stem cell micromanagment by the niche

### **Keywords**

DamID / Kibra / Salvador / stem cell niche / Zfh1

## Niche control of stem cell proliferation

### **Abstract**

Niches are traditionally characterized as signalling microenvironments that allow stem cells to maintain their fate. This definition implicitly assumes the integration of multiple niche signals towards a binary decision between stemness and differentiation. However, observations in multiple systems have demonstrated that stem cell properties such as proliferation and differentiation can be uncoupled at the level of niche signalling input, which is incompatible with this traditional view. We have studied the role of the transcriptional regulator Zfh1, a shared target of the Hedgehog and Jak/Stat niche signalling pathways in the somatic cyst stem cells of the *Drosophila* testis. We demonstrate that Zfh1 binds and downregulates *salvador* and *kibra*, two tumour suppressor genes of the Hippo/Wts/Yki pathway. Yki activation is thereby restricted to the Zfh1 positive stem cells, which are hence the only somatic cell able to proliferate. Our observations therefore trace a direct connection from stem cell proliferation back to niche signal input, and provide a mechanistic example for the "micromanagement" of an individual aspect of stem cell behaviour by the niche.

## **Introduction**

Stem cell proliferation and maintenance are typically regulated by niches, signalling microenvironments within tissues that allow resident stem cells to fulfill their functions (Scadden, 2014). Since the first, molecular validation of such a niche in the *Drosophila* ovary (Xie and Spradling, 2000), niche based regulation of stem cells has been observed in a wide variety of systems, and has largely been discussed using a conceptual framework that considers stemness and differentiation as alternative outcomes of a cell fate decision. Implicitly, this definition suggests that a stem cell makes this choice by integrating the incoming niche signals. Niches were accordingly seen as a means by which the organism can influence this binary decision (Fuller and Spradling, 2007). However, this model is at odds with recent results in various organisms. For example, niche cells, stem cells, and their differentiating progeny in the mammalian intestinal epithelium exhibit considerable plasticity (Beumer and Clevers, 2016), while proliferation and differentiation of stem cells in the *Drosophila* testis can be genetically uncoupled at the level of niche signalling input (Amoyel et al., 2013; Michel et al., 2012). These observations raise fundamental questions about the nature of stemness and the function of niches.

The *Drosophila* testis offers an excellent model system to study the interactions between stem cells and their niche, as niche signalling activity can be genetically manipulated and the outcome monitored with single cell resolution. In the testis, two types of stem cells, the germline stem cells (GSCs) and the somatic cyst stem cells (CySCs), surround a group of postmitotic, somatic niche cells termed hub that provides multiple niche signals regulating both stem cell pools. In the somatic lineage, the CySCs are the only dividing cells, directly giving rise to differentiating cyst cells (CyCs) that exit the niche with the developing germline clusters (Losick et al., 2011). CySC maintenance and proliferation requires niche signals by Unpaired (Upd) (Leatherman and Dinardo, 2008) and Hedgehog (Hh) (Amoyel et al., 2013; Michel et al., 2012). Both ligands are produced by the hub and activate the Jak/Stat and Smoothed signalling cascades, respectively, within the CySCs. The two pathways each have multiple, specific targets, but converge on the large, zinc finger and homeodomain containing transcription factor Zfh1 (Fortini et al., 1991). Zfh1 marks the somatic CySC pool within the testis and is absent from differentiated CyCs (Leatherman and Dinardo, 2008) (Figure 1A). Clonal inactivation of either Hh or Upd

## Niche control of stem cell proliferation

signalling or their shared target *zfh1* leads to the loss of the mutant CySCs from the stem cell pool by differentiation (Amoyel et al., 2013; Leatherman and Dinardo, 2008; Michel et al., 2012). *Zfh1* is thus required for CySC stemness.

Whether *Zfh1* is also sufficient for CySC proliferation and self-renewal is less clear. *Upd* overexpression or Jak/Stat pathway overactivation causes the proliferation of *Zfh1* positive, CySC-like cells (Leatherman and Dinardo, 2008) (Figure 1B) that retain stem cell characteristics such as proliferation and non-differentiation (Leatherman and Dinardo, 2008). However, these cells also acquire certain niche properties including the expression of BMP ligands (Leatherman and Dinardo, 2010). This renders them able to recruit and maintain GSCs, a niche activity normally provided by the hub (Inaba et al., 2015; Kawase et al., 2004; Michel et al., 2011), resulting in stably proliferating, mixed lineage tumours. Prolonged, Gal4 mediated overexpression of *Zfh1* causes a similar phenotype (Leatherman and Dinardo, 2008), which led to the conclusion that *Zfh1* expression was also sufficient for CySC stemness. However, while proliferation of the *Zfh1* overexpressing cells is rapidly detectable, tumour formation similar to that seen immediately with Jak/Stat pathway activation takes many days, suggesting that secondary regulatory events may be involved.

In contrast, overactivation of the Hh pathway, e.g. by inactivation of *patched (ptc)*, also upregulates *Zfh1* expression and causes accelerated proliferation of the mutant clones (Amoyel et al., 2013; Michel et al., 2012). However, despite initially expressing high levels of *Zfh1*, the affected cells retain the ability and propensity to differentiate (Amoyel et al., 2013; Michel et al., 2012), suggesting that *Zfh1* expression alone is not sufficient for specifying a stable CySC fate.

We therefore hypothesized that the primary role of *Zfh1* was to promote CySC proliferation in response to either niche signal, and decided to identify *Zfh1* target genes by mapping its binding sites in the CySCs through an *in vivo* DamID approach (Southall et al., 2013).

Here we report that i) *Zfh1* binds to the putative control regions of multiple genes encoding upstream components of the Hippo/Warts/Yki signalling cascade, including the tumour suppressors *sav* and *kibra*, that ii) *Zfh1 in vivo* partially suppresses the transcription of both genes, that iii) activation of Yki, which is necessary and

## Niche control of stem cell proliferation

sufficient for stem cell proliferation, is thereby restricted to the Zfh1 positive CySCs, and iv) confirm that clonal, constitutive activation of Yki does not affect the ability of the affected stem cells to differentiate. Proliferation of the somatic stem cells in the fly testis can therefore be traced back all the way to the Hh and Upd niche signalling input, and can be genetically uncoupled from the control of differentiation.

Our observations thus identify the mechanism underlying the control of stem cell proliferation by the niche, and provide an explanation for the independent regulation of differentiation. We discuss the implications of these and other recent results for the overall concept of stemness, and propose a new, "micromanagement" model of niche function, whereby different niche signals directly and independently control distinct subsets of stem cell behaviour.

## **Results**

### **C-terminally tagged Zfh1 fusion proteins are functional**

Visualization of expression patterns by GFP reporters and temporally and spatially controlled expression using the Gal4 system are key elements of the *Drosophila* toolbox, but were still missing for *zfh1* when we started studying how this gene links niche signals and CySC proliferation. The *zfh1* locus possesses two transcription starts separated by about 17kb. The respective transcripts are spliced to common 3' exons (Figure 1C), giving rise to two isoforms that are both expressed in the testis (Figure S1). *zfh1-RA* encodes a 747aa protein containing seven C2H2 zinc fingers and a central homeodomain, while the 1045aa protein encoded by *zfh1-RB* contains two additional, N-terminal zinc fingers. We therefore targeted GFP to the common C-terminus (Figure 1C) by Crispr/Cas9 mediated recombination (Gratz et al., 2014; Port et al., 2014). The Zfh1-GFP knockin lines were homozygous viable and fertile. In the testis, Zfh1-GFP marks the nuclei of somatic cells in the first tier surrounding the hub, coinciding with the expression of endogenous Zfh1 in the CySCs (Figure 1D).

To generate a driver line that captures expression of both isoforms we fused Gal4 to the Zfh1 C-terminus via a cotranslationally separating T2A peptide (Szymczak et al., 2004). The *zfh1-T2A-Gal4* knockin flies were subviable in the homozygous state (ca. 60% of expected adults hatching) and largely male sterile over a deficiency deleting the *zfh1* locus. Viability improved to Mendelian ratios and fertility recovered when the *w<sup>+</sup>* transgenesis marker was excised by *cre/lox* recombination. In the larva, *zfh1-T2A-Gal4* driven expression of nls-RFP uncovered a complex expression pattern that encompassed multiple tissues with reported Zfh1 presence (Broihier et al., 1998; Lai et al., 1991), including e.g. musculature, heart, nervous system, hemocytes, and gonads (Figure 1E). In the adult testis, RFP expression under control of *zfh1-T2A-Gal4* was confined to the endogenously Zfh1 positive CySCs (Figure 1F), demonstrating that the knockin line can direct transgene expression to our cells of interest.

Zfh-1 can therefore in principle tolerate C-terminal fusions without affecting protein function. Since the existing UAS-Zfh1 constructs (Postigo and Dean, 1999) are based on *zfh1-RB*, we opted for C-terminal modification of this isoform for the cDNA based DamID constructs described below.

### **Zfh1 binding sites identified by DamID in S2 cells are enriched at active regulatory regions**

To identify Zfh1 target sites in the genome we chose a NGS based DamID approach based on the TaDa system (Southall et al., 2013) that uses an mCherry leader ORF termed LT3 to achieve the desired, low expression levels of the Dam and Dam fusion proteins (Figure S2A). We first validated this approach for Zfh1 by mapping its binding to the DNA of cultured S2 cells that also endogenously express Zfh1 (Figure S2B). We generated stably transfected, polyclonal S2 cell lines expressing either LT3-Dam or LT3-Zfh1-Dam under control of the metallothionein promoter. Applying the damid\_seq analysis pipeline (Marshall and Brand, 2015) to our samples flagged 1125 peaks (Figure 2A) associated with 1052 genes based on two replica experiments (Spearman correlation between replicates  $\rho = 0.95$  (dam) and  $\rho = 0.96$  (zfh1-dam) (Figure 2B). Using a resampling / permutation approach (Zhu et al., 2010) we found that the S2 Zfh1 DamID peaks exhibited significant overlap with Zfh1 binding sites previously identified by ChIPseq in Kc167 cells (Negre et al., 2011) ( $n=134$ , permutation test,  $p<0.001$ ) (Figure 2C). Significant overlap was also observed between the genes associated with the Zfh1 peaks in either cell type ( $n=179$ ,  $\chi^2$ -test,  $p<0.0001$ ) (Figure 2D). In addition, 70% of the Zfh1 DamID peaks we identified in S2 cells coincided with regions flagged as enhancers in the same cell type by STARR-seq (Arnold et al., 2013) (Figure S2C), again significantly more often ( $n=785$ , permutation test,  $p<0.001$ ) than expected by chance (Figure 2E).

Finally, we compared the transcriptomes of S2 cells overexpressing either functional Zfh1 or a Zfh1 version unable to bind the transcriptional corepressor CtBP (Zfh1-CIDm) (Postigo and Dean, 1999). Upon overexpression of Zfh1-CIDm, 230 out of all 1052 genes associated with Zfh1 DamID peaks (21.9%) exhibited the expected signature of transcriptional derepression (Figure 2F,G). A comparable number instead showed decreased transcription levels (161/1052; 15.3%) (Figures 2G and S2D), while the majority of genes associated with a Zfh1 peak experienced no significant change (661/1052 genes; 62.8%) (Figures 2G and S2E). Zfh1 may therefore, like its mammalian homologue ZEB1 (Gheldof et al., 2012), not exclusively act as a CtBP-dependent transcriptional repressor. Importantly, though, the fraction of genes exhibiting changes in transcription in either direction was significantly higher amongst genes associated with at least one Zfh1 peak than for the overall

## Niche control of stem cell proliferation

transcriptome (37.5% vs. 9.3%,  $\chi^2$ -test:  $p < 0.0001$ ) (Figure 2H). Thus, DamID using a Zfh1-Dam fusion protein uncovered binding sites enriched for functional, Zfh1-dependent regulatory elements.

### Identifying Zfh1 target genes *in vivo*

We therefore decided to use the same fusion protein for mapping Zfh1 binding sites directly in the CySCs of the adult testis, and generated transgenic flies expressing Zfh1-Dam with the LT3 mCherry leader ORF under UAS control (UAS-LT3-zfh1-Dam) (Figure S3A). To suppress transgene expression prior to induction we recombined tub-Gal80<sup>ts</sup> transgenes both onto the chromosomes carrying the UAS-LT3-dam or UAS-LT3-Zfh1-dam insertions and onto the zfh1-T2A-Gal4 driver line. Following a 24h pulse of transgene expression DNA was then extracted from testes of adult males of the appropriate genotypes.

Applying the same analysis as above uncovered 811 Zfh1 peaks (Figure 3A) present in both replicates (Spearman correlation between replicates  $\rho = 0.97$  (dam) and  $\rho = 0.90$  (Zfh1-dam)) (Figure 3B). 377 of these sites (46%) were also occupied in S2 cells (Figure 3C), corresponding to 420 of the 968 genes associated with Zfh1 in CySCS (43%) (Figure 3D). 18% of the CySC zfh1 DamID peaks, again significantly more than expected by chance ( $n=150$ , permutation test,  $p < 0.001$ ), coincided with enhancers identified by STARR-seq in cultured ovarian somatic cells (OSCs) (Arnold et al., 2013), mesodermal cells developmentally related to the CySCs (Figure 3E,F). Significant overlap was also observed between the CySC Zfh1 DamID peaks and the Kc167 Zfh1 ChIP peaks ( $n=67$ , permutation test,  $p < 0.001$ ) and between the associated genes ( $n=113$ ,  $\chi^2$ -test,  $p < 0.001$ ) (Figure S3B,C). Finally, Gene Ontology analysis using Panther GO-Slim (Mi et al., 2016) revealed that a limited number of biological processes (7 of 222 terms) was overrepresented among the putative Zfh1 target genes (Figures 3G and S3D), amongst which the GO term "signal transduction" immediately raised our interest as a potential link to CySC proliferation.

### Zfh1 binds at or near genes encoding members of the Hippo signalling cascade

Since our aim was to understand the link between niche activity and stem cell proliferation we were intrigued by a cluster of hits in or near genes encoding components of the Hippo signalling cascade, a pathway generally associated with cell growth, proliferation, and survival (Enderle and McNeill, 2013; Irvine and Harvey,



## Niche control of stem cell proliferation

2015; Meng et al., 2016). It consists of a core of two serine/threonine kinases, Hippo (Hpo) and Warts (Wts), that phosphorylates and thus inactivates the effector transcription factor Yki. Activity of the core complex depends on the associated adapter proteins Salvador (Sav) (Tapon et al., 2002) and Mob-as-tumour-suppressor (Mats), and on scaffolding proteins such as Expanded, Kibra (Baumgartner et al., 2010; Genevet et al., 2010; Yu et al., 2010), and Merlin that recruit the complex to the plasma membrane. Inactivation of the upstream components or the kinase complex, either by physiological signals or by mutation, allows Yki to enter the nucleus and promote target gene expression. In CySCs, we detected Zfh1 binding at or near the *kibra*, *sav*, and *mats* genes (Figures 3A and S4). In S2 cells the peak near *mats* was absent. Instead, binding was additionally observed at *ex*, *pez*, *wts*, and *sd* (Figure S4).

The ability of overexpressed Zfh1 to induce somatic cell proliferation in the testis depends on its function as a CtBP-dependent transcriptional repressor (Leatherman and Dinardo, 2008; Postigo and Dean, 1999). Binding of Zfh1 to Hpo pathway tumour suppressors thus immediately suggested a direct and linear connection between niche signalling and stem cell proliferation: Upd and/or Hh niche signals produced by the hub locally activate Zfh1 expression in adjacent somatic cells. This represses multiple Hpo pathway components, thereby activating Yki exclusively in the Zfh1 positive stem cells. Consistently, a transcriptional reporter for Yki activity (*diap1*-GFP4.3), in which a minimal Yki response element derived from the *diap1* gene drives expression of a nuclear GFP (Zhang et al., 2008), is in the adult testis largely restricted to the Zfh1 positive CySCs (89±9% of all Zfh1 positive cells and 84±7% *diap*-GFP positive cells double positive) (Figure 4A). Moreover, Zfh1 overexpression in the somatic lineage using the traffic jam (Tj)-Gal4 driver expanded the region exhibiting Yki activation (Figure 4B,C), while the associated increase in somatic cell count was sensitive to *yki* copy number (Figure S5A,B).

For the remaining experiments addressing the link between Zfh1 expression, Hpo signalling, and CySC proliferation we focussed on two of the putative target Zfh1 genes, *sav* and *kibra*.

### **Sav and Kibra limit CySC proliferation**

Expression of Yki is required, and its experimental activation, e.g. by clonal mutation of *hpo*, sufficient for upregulating CySC proliferation (Amoyel et al., 2014). We

## Niche control of stem cell proliferation

confirmed this also for mutations in *kibra* and *sav*: Relative to controls, homozygous *kibra* clones rapidly expanded (Figure 4D,E). The effect of clonal inactivation of *sav* was less pronounced in the short term but was readily detectable by increased long term retention of the clones, reflecting a reduced rate of loss from the niche (Amoyel et al., 2014) (Figure S5C,D). BrdU labelling confirmed that the expansion of the *kibra* clones was due to increased proliferation (Figure S5E,F). Homozygosity for *kibra* did not block differentiation, as indicated by the expression of both the CySC marker *Zfh1* and the CyC differentiation marker *Eya* (Fabrizio et al., 2003) in different cells of the same clone (Figure 4F). Both three and five days after clone induction (ACI) the fraction of *Zfh1* positive cells did not differ between control and *kibra* mutant clones (Figure 4G). As previously noted for *hpo* clones (Amoyel et al., 2014), the increased proliferation of the *sav* or *kibra* mutant stem cells is thus uncoupled from their ability and propensity to differentiate.

### **Kibra is expressed in the somatic lineage and is downregulated by ectopic *Zfh1* expression**

However, these experiments do not answer whether the putative niche signal - *Zfh1* - Hippo axis regulates CySC proliferation under physiological conditions. We therefore wanted to know whether *Kibra* was expressed in the somatic lineage, and whether its expression was reduced in the *Zfh1*-positive CySCs. However, in the adult testis, *Kibra* antibody staining (Figure 5A) primarily marks the spectrosomes and fusomes in the germline cells, even though the *Hpo* pathway does not regulate the proliferation of these cells (Amoyel et al., 2014; Sun et al., 2008). In the somatic lineage, *Kibra* protein could with confidence only be observed in the hub, while the diffuse staining at the interface of germline and somatic cells could not be assigned to either cell type due to their tight apposition in the testis tip.

In contrast, the nuclei of the two lineages can be readily separated. To assess *kibra* transcription in the testis we therefore generated a construct containing *kibra* exons 5-9, C-terminally fused to a nuclear GFP via a T2A site. This construct was then targeted to a MiMIC landing site (MI13703) (Venken et al., 2011) inserted in the fourth intron of the *kibra* locus (Figure 5B), resulting in viable and fertile *kibra*-T2A-GFPnls flies. Nuclear GFP expression confirmed *kibra* transcription in both germline and soma. Within the somatic lineage nuclear GFP immunofluorescence was strongest in the hub (184% of median CyC levels) (Figure 5C,D). A somewhat

## Niche control of stem cell proliferation

weaker signal was also visible in CySCs, identified here as cells abutting the hub and expressing the somatic marker Tj, and in recently differentiated CyCs (Tj positive cells one tier further out) (Figure 5C). Compared with the CyCs, median nuclear GFP levels in the CySC were reduced by 23% (Figure 5D), consistent with the hypothesis that Zfh1 downregulates *kibra* transcription.

Hub cells endogenously express Kibra but not Zfh1. This allowed us to test whether Zfh1 expression was sufficient to suppress *kibra* transcription *in vivo* by mosaic coexpression of Zfh1 and nlsRFP. In line with the observations on the Zfh1 positive stem cells and their Zfh1 negative progeny, GFP levels in hub cell nuclei overexpressing Zfh1 were reduced by 15% relative to their non-overexpressing neighbours (Figure 5E,F). However, the presence of multiple, potential Zfh1 binding sites (Figure S4) made it impractical to test directly whether *kibra* expression in the CySCs is downregulated by endogenous Zfh1.

### **Sav expression is sensitive to endogenous Zfh1**

Compared with *kibra*, the *sav* locus is smaller and possesses only a single Zfh1 DamID peak located 3' of the coding region (Figure 3A). We therefore could address whether *sav* expression was sensitive to endogenous Zfh1 using a series of GFP based reporter constructs (Figure 6A). We isolated a genomic fragment spanning the *sav* genomic region, extending into the transcription units of the flanking genes and encompassing the entire Zfh1 DamID peak. As for Kibra, we tagged Sav with T2A-GFPnls. Nuclear GFP from this *sav*-T2A-GFPnls reporter was expressed in the germline, with a weaker signal in the somatic CySCs and CyCs, but, unlike *kibra*, no expression in the hub (Figure 6B). Derepression of *sav* in the CyCs could potentially negatively affect stem cell maintenance. Before modifying the presumptive control region we therefore deleted the Sav coding region and T2A cassette from our reporter (Figure 6A). The GFP expression pattern of this GFPnls-full\_length construct was indistinguishable from that of the *sav*-T2A-GFPnls reporter (Figure 6B,C).

DamID resolution is intrinsically limited by the distribution of the GATC target sites. In the case of the *sav* Zfh1 DamID peak, the flanking GATC sites are separated by 1063bp. This region contains a short motif with high similarity (10bp of 12bp identical) to the repressive Zfh1 homeodomain binding site within the *eve* mesodermal enhancer (Su et al., 1999), that had in turn been recognized due to its

## Niche control of stem cell proliferation

similarity to the conserved RCSI homeodomain binding motif used for cloning *zfh1* (Fortini et al., 1991). (Figure 6A). Similar, putative Zfh1 homeodomain binding sites corresponding to the degenerate sequence CTAATYRRNTT used to identify the *eve* RCSI-like motif (Su et al., 1999) were indeed significantly enriched in Zfh1 DamID peaks from both S2 cells (PWMEnrich raw score 1.377;  $p=8.06 \text{ E-}11$ ) and CySCs (raw score 1.421;  $p=1.377 \text{ E-}07$ ) (Stojnic, R. and Diez, D. (2015). PWMEnrich, R package 4.6.0).

We therefore first removed the central third of *sav/CG17119* intergenic region that overlaps with the Zfh1 DamID peak and includes the RCSI-like sequence motif (GFPnls- $\Delta$ NsiPst). In the final construct, we selectively deleted this putative Zfh1 binding site (GFPnls- $\Delta$ RCSI) (Figure 6A).

We then quantified relative GFP fluorescence in CySC and adjacent CyC nuclei for all four reporter lines (Figure 6B-F). For both the *sav*-T2A-GFPnls and the GFP-full length constructs (Figure 6B,C) GFP fluorescence was about 20% lower in the endogenously Zfh1 positive CySCs (again identified by position and Tj immunostaining) than in their differentiating CyC neighbours (Figure 6F). This difference was abolished for both constructs carrying the deletions within the Zfh1 DamID peak (GFPnls- $\Delta$ NsiPst and GFPnls- $\Delta$ RCSI) (Figure 6D-F), confirming that the RCSI-like motif is the *cis*-acting element responsible for downregulation of *sav* expression in the Zfh1-positive CySCs.

Taken together our observations show that the DamID experiments successfully uncovered target genes regulated by Zfh1 in the adult testis, that the regions flagged as Zfh1 binding peaks contain sequence elements conveying Zfh1 sensitivity, and that Zfh1 promotes CySC proliferation by downregulating transcription of Hippo pathway components.

## **Discussion**

Stemness and differentiation were until recently largely treated as alternative outcomes of a binary decision made by a stem cell. This cell fate decision would globally govern the subsequent behaviour of these cells (Figure 7A), while the niche acted upstream to influence this decision (Fuller and Spradling, 2007). However, such a model cannot easily account for niches, e.g. in the mammalian intestine (Beumer and Clevers, 2016), that exhibit high plasticity and where cells adopt different functions according to need.

A second challenge to this view of stemness and niche function comes from vertebrate regeneration models such as the zebrafish fin, where transient niches are formed upon amputation that appear to induce dedifferentiation of cells in the remaining tissue. When the stem cell-like blastema cells eventually differentiate they obey strict lineage restriction (Sehring et al., 2016). This demands the persistence of some form of memory of their previous nature, which is again not readily compatible with treating stemness as the diametral opposite of differentiation.

Finally, we and others had previously found that experimental activation of the Hh pathway upregulates proliferation of somatic CySCs, but does not affect the differentiation behaviour of the mutant clones (Amoyel et al., 2013; Amoyel et al., 2014; Michel et al., 2012). In contrast, overexpression of Upd drives the proliferation of undifferentiated, stem cell like cells (Leatherman and Dinardo, 2008). Manipulation of either of these endogenously active signalling pathways thus impinges on distinct subsets of stem cell properties. Such a partial alteration of stem cell behaviour should not be possible if niche signals became integrated into a decision between stemness and differentiation (Figure 7A). The observations presented here point at an alternative interpretation that may be able to resolve these issues.

Our results suggest that a direct, regulatory link exists between individual niche signal inputs and a specific stem cell behavioural output. In the fly testis the Hh and Upd niche signals converge on Zfh1, which we found to bind to multiple genes encoding regulators of the Hippo signalling cascade. For two of these genes, *sav* and *kibra*, we could show that this results in a partial suppression of transcription, as reflected by reduced reporter gene expression in endogenously Zfh1 positive CySCs. For *sav* we

## Niche control of stem cell proliferation

were able to map the *cis*-acting sequence conveying this repression to a conserved, putative homeodomain binding motif within the Zfh1 DamID peak, while misexpression in the hub demonstrated that Zfh1 is sufficient to suppress *kibra* transcription *in vivo*. Even though both genes are downregulated in CySCs by no more than 25%, Yki activation in the testis is tightly restricted to the Zfh1 positive stem cells, with the small fraction of single positive cells presumably explained by differences in the maturation and degradation rates of the two proteins. Since the loss of one copy of any individual Hpo pathway gene has no obvious phenotype, we must postulate that Yki activity is controlled cooperatively through the modulation of multiple regulators. Surprisingly, in the ovary Hh instead regulates Hippo signalling through transcriptional control of Yki (Huang and Kalderon, 2014). At the moment we have no explanation as to why the male and female niches should make use of the same molecular players but follow a different regulatory logic. Nevertheless, our results show how in the testis one specific, genetically separable aspect of stem cell behaviour can be traced back to its niche signal input.

Generalizing from these observations we would like to suggest that the true function of the niche is not to aid resident stem cells in choosing between stemness and proliferation, but to directly instruct competent cells to execute stem cell specific behaviours. We would like to propose the term "micromanagement" for this mode of niche mediated stem cell regulation (Figure 7B). "Stemness" would thus become an operational description given to any cell instructed to self renew and produce differentiating offspring, without having to invoke a cell fate decision.

This model comes with several caveats. First, the somatic CySCs of the fly testis or the stem cells of the mammalian intestinal epithelium may represent one extreme within a continuum of stem cell / niche systems that differ in the relative contribution of fate specification and micromanagement. The mammalian hematopoietic system, which has guided much of our thought about stemness and niches (Scadden, 2014), and indeed the *Drosophila* germline stem cells, which are maintained primarily through suppression of the differentiation factor Bam by a hub derived BMP niche signal (Chen and McKearin, 2003; Kawase et al., 2004) may then represent the other end of the spectrum.

Second, the competence of a cell to respond to a given niche microenvironment does, to some extent, depend on cell fate decisions along its developmental trajectory:

## Niche control of stem cell proliferation

Unlike the CySC/CyC lineage, the muscle sheath of the testis does not respond to Upd or Hh overexpression by proliferating, even though both cell types are of mesodermal origin. In this context, the micromanagement model may provide a simple explanation for the phenomenon of lineage restriction during regeneration: If the transient niche formed after fin amputation did not induce actual dedifferentiation (i.e. a true cell fate decision), but cells in the stump were merely competent to respond to niche signals by temporarily suspending their normal physiological activities (e.g. ECM deposition in the case of osteoblasts) in favour of proliferating and migrating to the blastema, the need to postulate a separate cell fate memory disappears.

Third, the micromanagement model we propose will still be a truncation of the true regulatory network. For example, we already know that different aspects of stem cell activity in the testis are coupled by competition (Amoyel et al., 2016; Issigonis et al., 2009; Singh et al., 2016). This makes it difficult to analyze loss of function conditions in our model system, as affected cells are eliminated by differentiation before they can be studied. In addition, the subsets of stem cell behaviours controlled by different niche signals may overlap, and any individual signal can control multiple aspects of stemness. For example, Upd not only cooperates with Hh to promote CySC proliferation through Zfh1, but independently ensures male specific development of the somatic lineage through Chinmo (Flaherty et al., 2010; Ma et al., 2014). Even Zfh1 itself is likely to control additional aspects of stemness: Hippo pathway components account for only a small fraction of the many hundred potential target genes we identified in the CySCs. We found Zfh1 peaks e.g. also near multiple genes involved in glucose and energy metabolism, with carbohydrate transport appearing as a significantly enriched GO term. This invites the intriguing speculation that a potential, Warburg-like stem cell metabolic state (Chandel et al., 2016) may also be the outcome of detailed, continuous regulation by the niche rather than an intrinsic property of the stem cells.

Finally, under our micromanagement model, the minimal unit of stemness is a stem cell together with its niche. Obviously this can only hold true for tissue resident stem cells that actually are integrated with a niche, but may not apply to embryonic stem cells that are, at least *in vitro*, able to retain their stem cell properties in the absence of a complex signalling microenvironment.



## **Materials and methods**

### **Fly stocks and transgenic lines**

w;UAS-zfh1; w;;UAS-RedStinger; w;;FRT82B w<sup>+90E</sup>; w;Sco/CyO;tub-GAL80<sup>ts</sup>; y w;MiMIC kibra<sup>M113703</sup>; y w;;Act5C>CD2Y>GAL4; and y sc v nos-phiC31Int;;attP2 were obtained from the Bloomington Drosophila Stock Center.

The following stocks were graciously provided by our colleagues: UAS-Hop<sup>tumL</sup> (Bruce Edgar); y w vasa-Cas9/FM7c (Anne Morbach); UAS-LT3-Dam (Andrea Brand); tj Gal4 Gal80<sup>ts</sup> (Doug Allan); y w;Sp / CyO, y<sup>+</sup>;FRT82 kibra<sup>1</sup> / TM6B, Tb, Hu; y w;Sp/CyO,y<sup>+</sup>;diap1-GFP4.3/TM6B, Tb; w;FRTD 42D yki<sup>B5</sup>/CyO (Hugo Stocker); FRT 82B sav<sup>3</sup>/TM3 Sb (Florence Janody, Nic Tapon).

MARCM clones (Lee and Luo, 1999) were generated by crossing FRT males to w hs-FLP C587-Gal4 UAS-RedStinger virgins carrying the appropriate tub-Gal80 FRT chromosomes and heat shocking adult males for 1h at 37°C.

The zfh1-GFP and zfh1-T2A-Gal4 transgenes were generated by coinjecting two pU6-BbsI-gRNA plasmids (Gratz et al., 2014) (Addgene 45946) with a pRK2 (Huang et al., 2008) derived plasmid containing the transgene sequence, 1kb homology arms, and a w<sup>+</sup> selection marker into y w vasa-Cas9/FM7c embryos.

The kibra-T2A-GFP line was generated by injecting a pBSKS-attB1\_2SASD-0 plasmid (gift from Frank Schnorrer) containing kibra exons 5 to 9 fused to T2A-GFPnls into nos-phiC31Int;MiMIC kibra<sup>M113703</sup> embryos.

The Sav reporter constructs were generated by fusing a T2A-GFPnls cassette to the Sav C-terminus in a genomic construct extending into the coding regions of the adjacent genes. Next, the sav coding region and the 3' UTR segments were excised by fusion PCR and deletions introduced to the Zfh1 DamID peak. Constructs were cloned into pUAST-attB, removing the UAS sites, and injected into nos-phiC31Int;;attP40 embryos.

For UAS-LT3-zfh1-Dam the zfh1-RB ORF (Korneel Hens) was inserted into pUAST-attB-LT3-Dam (Andrea Brand) at Dam start codon and the plasmid injected into nos-phiC31Int;;attP2 embryos.

Full sequences are available upon request.



### **Antibodies and immunohistochemistry**

Testes were stained as described (Michel et al., 2011), incorporating an additional 1h permeabilization step with 1% Triton X-100 following fixation. The following antisera were used: rat-anti-DECadherin (DSHB, DCAD2) 1:100, mouse-anti-Eya (DSHB, *eya10H6*) 1:20, mouse-anti-FasIII (DSHB, 7G10) 1:100, rabbit-anti-GFP (Clontech) 1:500, rabbit-anti-Kibra (Nic Tapon) 1:200, rat-anti-Tj (Dorothea Godt) 1:250, Rabbit anti-vasa (Paul Lasko) 1:5000, rabbit-anti-Zfh1 (Ruth Lehmann) 1:4000. Secondary ABs raised in goat and labelled with Alexa-488, -568, or -633 (Invitrogen) were used 1:500.

### **BrdU labeling**

Flies were fed on food containing 2 mg/ml BrdU for 8h. In addition to the standard immunostaining protocol testes were incubated for 30min in 2M HCl, neutralized with 100mM borax solution and incubated with mouse anti-BrdU-Alexa 488 (BD) 1:200 over night.

### **Imaging and image analysis**

Images were acquired using Leica SP5, Zeiss LSM700, and Zeiss LSM780 confocal microscopes with 40x or 63x water immersion objectives. Unless stated otherwise, images are single optical slices. Image quantifications were performed using Fiji (Schindelin et al., 2012), applying a double blind protocol where appropriate. Differences between samples were tested for significance using Student's t-test or ANOVA followed by Tukey's HSD as appropriate. Images were prepared for publication using Adobe Photoshop and Illustrator.

### **Cell culture**

S2 cells were cultivated at room temperature in Schneider's Drosophila Medium (Pan Biotech) with 10% FBS (Thermo Scientific) and transfected using a standard calcium phosphate protocol. Stable cell lines were selected on hygromycin B (Sigma).

### **RNAseq**

Zfh1 and Zfh1-CIDm expression was induced with 1mM CuSO<sub>4</sub> for 24h before RNA extraction using Direct-zol (Zymo Research). RNA was quality checked with bioanalyser (Aligned Genomic) and sequenced by the CRTD/Biotec NGS facility using an Illumina HiSeq2000 machine.

## DamID

For the in vitro experiments DNA was extracted from stable mtn-Dam or mtn-Zfh1-Dam cell lines with Trizol (Sigmaaldrich) without Cu<sup>2+</sup> induction. For the in vivo experiments DNA was extracted from testes proper of 50 zfh1-T2A-Gal4 tub-Gal80<sup>ts</sup>/UAS-LT3-Zfh1-Dam tub-Gal80<sup>ts</sup> and zfh1-T2A-Gal4 tub-Gal80<sup>ts</sup>/UAS-LT3-Dam tub-Gal80<sup>ts</sup> males following 24h induction at 30°C as described in (Laktionov et al., 2014). Samples were prepared according to (Southall et al., 2013) and sequenced by the CRTD/Biotec NGS facility using a Illumina HiSeq2000 machine.

## Bioinformatics

NGS reads from the DamID experiments were mapped to the *Drosophila* genome (dm6) using bowtie2. Zfh1 peaks were called using damid\_seq analysis pipeline (Marshall and Brand, 2015). Results were analyzed using the find\_peaks script (Marshall and Brand, 2015) with the false discovery rate (FDR) threshold set to 0.01. Overlap of the Zfh1 DamID peaks thus identified in S2 cells and CySCs with each other, Zfh1 ChIP peaks from Kc167 cells (Negre et al., 2011), or STARR-seq peaks from S2 cells or OSCs (Arnold et al., 2013) was analyzed using the peakPermTest resampling / permutation approach implemented in the ChIPpeakAnno bioconductor package (Zhu et al., 2010) excluding the ENCODE *Drosophila* blacklist (Celniker et al., 2009). For each comparison, we performed 1000 resampling runs artificially redistributing peaks while conserving their distribution of relative positions to landmarks of the respective, associated genes (transcription starts and end, introns, and coding regions). Overlap between associated genes (defined as genes < 1kb distant from the ends of a Zfh1 DamID peak or other feature) was tested for significance using the  $\chi^2$ -test.

Enrichment of the degenerate, RCSI-like motif (CTAATYRRNTT) within Zfh1 DamID peaks was detected with help of the PWMenrich package (Stojnic, R. and Diez, D. (2015). PWMenrich, R package).

RNASeq analysis was performed using the DESeq R package (Anders and Huber, 2010). Reads were normalized according to the library complexity. Gene annotation was obtained from ENSEMBL (BDGP6 version) using the biomaRt R package (Smedley et al., 2009). Genes were flagged as significantly changing expression if the corresponding adjusted p-values were below 0.05.

### **Acknowledgements**

We would like to thank the colleagues mentioned individually above and the JEDI community for fly stocks, reagents, and advice, the CRTD NGS sequencing facility for their support, and Heiner Grandel, Christian Lange, Nikolay Ninov, and Pavel Tomancak for discussions and critical reading of the manuscript. The project was supported by a CRTD seed grant and DFG grant BO 3270/4-1 to CB.

### **Author contributions:**

OAP performed the fly experiments, EAA performed the cell culture, DamID, and RNAseq experiments, EAA and NVT performed the bioinformatic analysis. All authors analysed and interpreted the data. CB initiated the project and wrote the manuscript.

### **Conflict of interest**

The authors declare no conflict of interest.

## **References**

Amoyel, M., Anderson, J., Suisse, A., Glasner, J., and Bach, E.A. (2016). Socs36E Controls Niche Competition by Repressing MAPK Signaling in the *Drosophila* Testis. *PLoS Genet* *12*, e1005815.

Amoyel, M., Sanny, J., Burel, M., and Bach, E.A. (2013). Hedgehog is required for CySC self-renewal but does not contribute to the GSC niche in the *Drosophila* testis. *Development* *140*, 56-65.

Amoyel, M., Simons, B.D., and Bach, E.A. (2014). Neutral competition of stem cells is skewed by proliferative changes downstream of Hh and Hpo. *The EMBO journal* *33*, 2295-2313.

Anders, S., and Huber, W. (2010). Differential expression analysis for sequence count data. *Genome Biol* *11*, R106.

Arnold, C.D., Gerlach, D., Stelzer, C., Boryn, L.M., Rath, M., and Stark, A. (2013). Genome-wide quantitative enhancer activity maps identified by STARR-seq. *Science* *339*, 1074-1077.

Baumgartner, R., Poernbacher, I., Buser, N., Hafen, E., and Stocker, H. (2010). The WW domain protein Kibra acts upstream of Hippo in *Drosophila*. *Dev Cell* *18*, 309-316.

Beumer, J., and Clevers, H. (2016). Regulation and plasticity of intestinal stem cells during homeostasis and regeneration. *Development* *143*, 3639-3649.

Broihier, H.T., Moore, L.A., Van Doren, M., Newman, S., and Lehmann, R. (1998). *zfh-1* is required for germ cell migration and gonadal mesoderm development in *Drosophila*. *Development* *125*, 655-666.

Celniker, S.E., Dillon, L.A., Gerstein, M.B., Gunsalus, K.C., Henikoff, S., Karpen, G.H., Kellis, M., Lai, E.C., Lieb, J.D., MacAlpine, D.M., *et al.* (2009). Unlocking the secrets of the genome. *Nature* *459*, 927-930.

Chandel, N.S., Jasper, H., Ho, T.T., and Passegue, E. (2016). Metabolic regulation of stem cell function in tissue homeostasis and organismal ageing. *Nat Cell Biol* *18*, 823-832.

## Niche control of stem cell proliferation

Chen, D., and McKearin, D. (2003). Dpp signaling silences bam transcription directly to establish asymmetric divisions of germline stem cells. *Curr Biol* *13*, 1786-1791.

Enderle, L., and McNeill, H. (2013). Hippo gains weight: added insights and complexity to pathway control. *Sci Signal* *6*, re7.

Fabrizio, J.J., Boyle, M., and DiNardo, S. (2003). A somatic role for eyes absent (*eya*) and sine oculis (*so*) in *Drosophila* spermatocyte development. *Developmental biology* *258*, 117-128.

Flaherty, M.S., Salis, P., Evans, C.J., Ekas, L.A., Marouf, A., Zavadil, J., Banerjee, U., and Bach, E.A. (2010). *chinmo* is a functional effector of the JAK/STAT pathway that regulates eye development, tumor formation, and stem cell self-renewal in *Drosophila*. *Dev Cell* *18*, 556-568.

Fortini, M.E., Lai, Z.C., and Rubin, G.M. (1991). The *Drosophila* *zfh-1* and *zfh-2* genes encode novel proteins containing both zinc-finger and homeodomain motifs. *Mech Dev* *34*, 113-122.

Fuller, M.T., and Spradling, A.C. (2007). Male and female *Drosophila* germline stem cells: two versions of immortality. *Science* *316*, 402-404.

Genevet, A., Wehr, M.C., Brain, R., Thompson, B.J., and Tapon, N. (2010). *Kibra* is a regulator of the Salvador/Warts/Hippo signaling network. *Dev Cell* *18*, 300-308.

Gheldof, A., Hulpiau, P., van Roy, F., De Craene, B., and Berx, G. (2012). Evolutionary functional analysis and molecular regulation of the ZEB transcription factors. *Cell Mol Life Sci* *69*, 2527-2541.

Gratz, S.J., Ukken, F.P., Rubinstein, C.D., Thiede, G., Donohue, L.K., Cummings, A.M., and O'Connor-Giles, K.M. (2014). Highly specific and efficient CRISPR/Cas9-catalyzed homology-directed repair in *Drosophila*. *Genetics* *196*, 961-971.

Huang, J., and Kalderon, D. (2014). Coupling of Hedgehog and Hippo pathways promotes stem cell maintenance by stimulating proliferation. *J Cell Biol* *205*, 325-338.

Huang, J., Zhou, W., Watson, A.M., Jan, Y.N., and Hong, Y. (2008). Efficient end-out gene targeting in *Drosophila*. *Genetics* *180*, 703-707.

## Niche control of stem cell proliferation

Inaba, M., Buszczak, M., and Yamashita, Y.M. (2015). Nanotubes mediate niche-stem-cell signalling in the *Drosophila* testis. *Nature* *523*, 329-332.

Irvine, K.D., and Harvey, K.F. (2015). Control of organ growth by patterning and hippo signaling in *Drosophila*. *Cold Spring Harbor perspectives in biology* *7*.

Issigonis, M., Tulina, N., de Cuevas, M., Brawley, C., Sandler, L., and Matunis, E. (2009). JAK-STAT signal inhibition regulates competition in the *Drosophila* testis stem cell niche. *Science* *326*, 153-156.

Kawase, E., Wong, M.D., Ding, B.C., and Xie, T. (2004). Gbb/Bmp signaling is essential for maintaining germline stem cells and for repressing bam transcription in the *Drosophila* testis. *Development* *131*, 1365-1375.

Lai, Z.C., Fortini, M.E., and Rubin, G.M. (1991). The embryonic expression patterns of *zfh-1* and *zfh-2*, two *Drosophila* genes encoding novel zinc-finger homeodomain proteins. *Mech Dev* *34*, 123-134.

Laktionov, P.P., White-Cooper, H., Maksimov, D.A., and Beliakin, S.N. (2014). [Transcription factor *comr* acts as a direct activator in the genetic program controlling spermatogenesis in *D. melanogaster*]. *Mol Biol (Mosk)* *48*, 153-165.

Leatherman, J.L., and Dinardo, S. (2008). *Zfh-1* controls somatic stem cell self-renewal in the *Drosophila* testis and nonautonomously influences germline stem cell self-renewal. *Cell stem cell* *3*, 44-54.

Leatherman, J.L., and Dinardo, S. (2010). Germline self-renewal requires cyst stem cells and *stat* regulates niche adhesion in *Drosophila* testes. *Nat Cell Biol* *12*, 806-811.

Lee, T., and Luo, L. (1999). Mosaic analysis with a repressible cell marker for studies of gene function in neuronal morphogenesis. *Neuron* *22*, 451-461.

Losick, V.P., Morris, L.X., Fox, D.T., and Spradling, A. (2011). *Drosophila* stem cell niches: a decade of discovery suggests a unified view of stem cell regulation. *Dev Cell* *21*, 159-171.

Ma, Q., Wawersik, M., and Matunis, E.L. (2014). The Jak-STAT target *Chinmo* prevents sex transformation of adult stem cells in the *Drosophila* testis niche. *Dev Cell* *31*, 474-486.

## Niche control of stem cell proliferation

Marshall, O.J., and Brand, A.H. (2015). damidseq\_pipeline: an automated pipeline for processing DamID sequencing datasets. *Bioinformatics* *31*, 3371-3373.

Meng, Z., Moroishi, T., and Guan, K.L. (2016). Mechanisms of Hippo pathway regulation. *Genes Dev* *30*, 1-17.

Mi, H., Poudel, S., Muruganujan, A., Casagrande, J.T., and Thomas, P.D. (2016). PANTHER version 10: expanded protein families and functions, and analysis tools. *Nucleic Acids Res* *44*, D336-342.

Michel, M., Kupinski, A.P., Raabe, I., and Bökel, C. (2012). Hh signalling is essential for somatic stem cell maintenance in the *Drosophila* testis niche. *Development* *139*, 2663-2669.

Michel, M., Raabe, I., Kupinski, A.P., Perez-Palencia, R., and Bökel, C. (2011). Local BMP receptor activation at adherens junctions in the *Drosophila* germline stem cell niche. *Nat Commun* *2*, 415.

Negre, N., Brown, C.D., Ma, L., Bristow, C.A., Miller, S.W., Wagner, U., Kheradpour, P., Eaton, M.L., Loriaux, P., Sealfon, R., *et al.* (2011). A cis-regulatory map of the *Drosophila* genome. *Nature* *471*, 527-531.

Port, F., Chen, H.M., Lee, T., and Bullock, S.L. (2014). Optimized CRISPR/Cas tools for efficient germline and somatic genome engineering in *Drosophila*. *Proceedings of the National Academy of Sciences of the United States of America* *111*, E2967-2976.

Postigo, A.A., and Dean, D.C. (1999). ZEB represses transcription through interaction with the corepressor CtBP. *Proceedings of the National Academy of Sciences of the United States of America* *96*, 6683-6688.

Scadden, D.T. (2014). Nice neighborhood: emerging concepts of the stem cell niche. *Cell* *157*, 41-50.

Schindelin, J., Arganda-Carreras, I., Frise, E., Kaynig, V., Longair, M., Pietzsch, T., Preibisch, S., Rueden, C., Saalfeld, S., Schmid, B., *et al.* (2012). Fiji: an open-source platform for biological-image analysis. *Nat Methods* *9*, 676-682.

Sehring, I.M., Jahn, C., and Weidinger, G. (2016). Zebrafish fin and heart: what's special about regeneration? *Curr Opin Genet Dev* *40*, 48-56.

## Niche control of stem cell proliferation

Singh, S.R., Liu, Y., Zhao, J., Zeng, X., and Hou, S.X. (2016). The novel tumour suppressor Madm regulates stem cell competition in the *Drosophila* testis. *Nat Commun* 7, 10473.

Smedley, D., Haider, S., Ballester, B., Holland, R., London, D., Thorisson, G., and Kasprzyk, A. (2009). BioMart--biological queries made easy. *BMC Genomics* 10, 22.

Southall, T.D., Gold, K.S., Egger, B., Davidson, C.M., Caygill, E.E., Marshall, O.J., and Brand, A.H. (2013). Cell-type-specific profiling of gene expression and chromatin binding without cell isolation: assaying RNA Pol II occupancy in neural stem cells. *Dev Cell* 26, 101-112.

Su, M.T., Fujioka, M., Goto, T., and Bodmer, R. (1999). The *Drosophila* homeobox genes *zfh-1* and *even-skipped* are required for cardiac-specific differentiation of a *numb*-dependent lineage decision. *Development* 126, 3241-3251.

Sun, S., Zhao, S., and Wang, Z. (2008). Genes of Hippo signaling network act unconventionally in the control of germline proliferation in *Drosophila*. *Dev Dyn* 237, 270-275.

Szymczak, A.L., Workman, C.J., Wang, Y., Vignali, K.M., Dilioglou, S., Vanin, E.F., and Vignali, D.A. (2004). Correction of multi-gene deficiency in vivo using a single 'self-cleaving' 2A peptide-based retroviral vector. *Nature biotechnology* 22, 589-594.

Tapon, N., Harvey, K.F., Bell, D.W., Wahrer, D.C., Schiripo, T.A., Haber, D., and Hariharan, I.K. (2002). *salvador* Promotes both cell cycle exit and apoptosis in *Drosophila* and is mutated in human cancer cell lines. *Cell* 110, 467-478.

Venken, K.J., Schulze, K.L., Haelterman, N.A., Pan, H., He, Y., Evans-Holm, M., Carlson, J.W., Levis, R.W., Spradling, A.C., Hoskins, R.A., *et al.* (2011). MiMIC: a highly versatile transposon insertion resource for engineering *Drosophila melanogaster* genes. *Nat Methods* 8, 737-743.

Xie, T., and Spradling, A.C. (2000). A niche maintaining germ line stem cells in the *Drosophila* ovary. *Science* 290, 328-330.

Yu, J., Zheng, Y., Dong, J., Klusza, S., Deng, W.M., and Pan, D. (2010). Kibra functions as a tumor suppressor protein that regulates Hippo signaling in conjunction with Merlin and Expanded. *Dev Cell* 18, 288-299.



## Niche control of stem cell proliferation

Zhang, L., Ren, F., Zhang, Q., Chen, Y., Wang, B., and Jiang, J. (2008). The TEAD/TEF family of transcription factor Scalloped mediates Hippo signaling in organ size control. *Dev Cell* *14*, 377-387.

Zhu, L.J., Gazin, C., Lawson, N.D., Pages, H., Lin, S.M., Lapointe, D.S., and Green, M.R. (2010). ChIPpeakAnno: a Bioconductor package to annotate ChIP-seq and ChIP-chip data. *BMC Bioinformatics* *11*, 237.

**Figure legends:**

**Figure 1 - Endogenous Zfh1 expression and Crispr/Cas9 generated reagents**

**A** CySCs are recognized by Zfh1 positive nuclei (green) one tier removed from the hub (DE-Cad, red). Nuclei marked by DAPI (blue).

**B** Zfh1 positive cells (blue) expand following a 2d pulse of the constitutively active Jak kinase Hop<sup>tmml</sup>. Hub and CyC outlines marked by DE-Cad (red).

**C** Schematic representation of the Zfh1 locus and C-terminal GFP and T2A-Gal4 fusions. Ellipses indicate loxP sites.

**D** Zfh1-GFP (green) colocalizes with Zfh1 immunostaining (red) in the vicinity of the hub (DE-Cad, blue).

**E,F** nlsRFP expression under control of zfh1-T2A-Gal4. **E** In the larva, RFP is expressed in multiple tissues including the testis (arrow). **F** in the adult testis nlsRFP (red) coincides with Zfh1 protein (blue) labelling the CySCs abutting the hub (DE-Cad, green).

Scale bars 10 $\mu$ m.

**Figure 2 - Zfh1 DamID in S2 cells**

**A** NGS reads from a Zfh1-Dam sample (top panel) are enriched relative to a Dam only control (bottom panel) near the MSR-110 distal transcription start (peak as called by damid\_seq, blue line; FDR indicated).

**B** Spearman correlation between replica experiments.

**C** Zfh1 DamID peaks in S2 cells colocalize with Zfh1 ChIP peaks in Kc167 cells ( $p < 0.001$ , permutation test). Distribution of overlaps from 1000 resamplings plotted against frequency; dashed arrow indicates observed value.

**D** Same as **C** for the respective associated genes ( $p < 0.001$ ,  $\chi^2$ -test).

**E** Zfh1 DamID peaks overlap ( $p < 0.001$ , permutation test) with enhancer regions identified by STARR-seq.

**F-H** Transcriptional changes following expression of a Zfh1 construct unable to bind CtBP (zfh1-CIDm). **F** MSR-110 exhibits transcriptional derepression. **G** Response to

## Niche control of stem cell proliferation

zfh1-CIDm expression by genes associated with a Zfh1 DamID peak. **H** Genes associated with a Zfh1 DamID peak are significantly more likely to exhibit changed transcription levels (\*\*\*,  $p < 0.001$ ,  $\chi^2$ -test).

### Figure 3 - *In vivo* Zfh1 DamID in CySC cells

**A** Zfh1 DamID reads are enriched near the 3'-UTR and intergenic region of the *sav* locus (extent of DamID peak, blue line; FDR indicated).

**B** Spearman correlation between replica experiments.

**C,D** 46% of CySC DamID peaks **C** and 43% of the associated genes **D** are also occupied in S2 cells, significantly more than expected by chance (C,  $p < 0.001$ , permutation test; D,  $p < 0.001$ ,  $\chi^2$ -test).

**E** CySC Zfh1 DamID peaks overlap with ovarian somatic cell enhancer regions ( $p < 0.001$ , permutation test)

**F** Comparison of Zfh1 damID peaks and OSC STARR-seq peaks for the *kibra* locus

**G** GO-slim terms enriched among Zfh1 associated genes.

### Figure 4 - The Hippo pathway controls CySC proliferation

**A** Activity of a GFP transcriptional reporter (green) based on a Yki dependent fragment of the *diap1* promoter is largely restricted to Zfh1 positive CySCs (blue). Hub marked by FasIII (red).

**B** Zfh1 overexpression in the somatic lineage (8d) expands the population of cells with active Yki to regions further from the hub (FasIII, blue).

**C** Quantification of **B**

**D** Homozygous *kibra* mutant MARCM clones (RFP, red) expand relative to control clones.

**E** Quantification of **D**

**F** A *kibra* clone (RFP, red) containing both cells expressing the stem cell marker Zfh1 (blue) or the differentiation marker Eya (green).

**G** *kibra* and control clones do not differ in the fraction of Zfh1 positive clonal cells.

## Niche control of stem cell proliferation

Box indicates first and third quartile; horizontal line, median; square, mean; whiskers, data range up to 1.5x interquartile distance. Outliers shown individually. Bar graphs, mean  $\pm$  SD. \*,  $p < 0.05$  \*\*\*,  $p < 0.01$  (t-test), n.s., not significant. Scale bars  $10\mu\text{m}$ .

### Figure 5 - Kibra expression in the testis

**A** Kibra immunostaining (red). Hub cells (DE-Cad, blue, arrows), spectroosomes (empty arrowhead) and fusomes (solid arrowhead) of the germline are marked.

**B** kibra-T2A-GFPnls construct inserted into a MiMIC landing site preceding exon 5. Ellipses, loxP sites.

**C-F** GFP immunostaining in the Kibra-T2A-GFPnls reporter line.

**C** Nuclear GFP is visible both in the germline (large, diffusely stained nuclei) and the somatic lineage, with pronounced staining in the hub (FasIII, blue). Note reduced signal in CySC nuclei identified as Tj-positive (red) nuclei abutting the hub (solid outline in inset) relative to their CyC neighbours (dashed outline).

**D** Quantification of GFP immunostaining.

**E** Zfh1 overexpression in RFP marked Flp-out clones (red, dashed outline) in the hub (FasIII, blue) decreases nuclear GFP levels (green) relative to sibling cells (solid outline).

**F** Ratio of GFP immunofluorescence between Zfh1 expressing and adjacent non-expressing nuclei or between controls.

Scale bars  $10\mu\text{m}$ . Solid line, median; square, mean; \*\*\*,  $p < 0.01$  (ANOVA). Box indicates first and third quartile and median. Whiskers indicate data range up to 1.5x interquartile distance. \*\*\*,  $p < 0.01$  (t-test).

### Figure 6 - Sav in the adult testis

**A** Organization of the *sav* locus, the sav-T2A-GFPnls construct, and the sav::GFPnls transcriptional reporters. Blue line, extent of Zfh1 DamID peak (gray shading). Blue box, RCSI-like putative Zfh1 binding site. Sequences from *sav*, the *eve* Zfh1 binding site, and the original RCSI sequence are indicated.

## Niche control of stem cell proliferation

**B-E** GFP immunofluorescence from the *sav* reporter constructs. Note GFP signal (green) in the large germline nuclei and smaller somatic nuclei (marked by Tj, red); hub marked by FasIII (blue).

**B** In the *sav*-T2A-GFPnls fusion construct, the GFP signal in CySC nuclei (identified by proximity to hub, solid outline) is reduced relative to the adjacent CyC nuclei (dashed outlines).

**C** Same for the *sav*::GFPnls<sub>full</sub> construct

**D** In *sav*::GFPnls<sub>ΔNsiP</sub> transgenic flies the difference in GFP intensity between CySC and CyC nuclei vanishes.

**E** Same for the *sav*::GFPnls<sub>ΔRCSI</sub> transgene.

**F** Ratio of GFP signals in adjacent CySC and CyC nuclei for **B-E**.

Scale bars 10 $\mu$ m. Box indicates first and third quartile and median. Whiskers indicate data range up to 1.5x interquartile distance. Outliers marked individually; \*\*\*,  $p < 0.01$  (ANOVA); n.s., not significant.

### Figure 7 - Models of stemness and niche function

**A** According to the traditional model, the various niche signals are integrated into a decision to adopt stem cell fate. Differentiation is the default response when such signals are absent.

**B** Under the proposed micromanagement model, niche signals continuously control genetically separable subsets of stem cell behavioural output.

## Niche control of stem cell proliferation

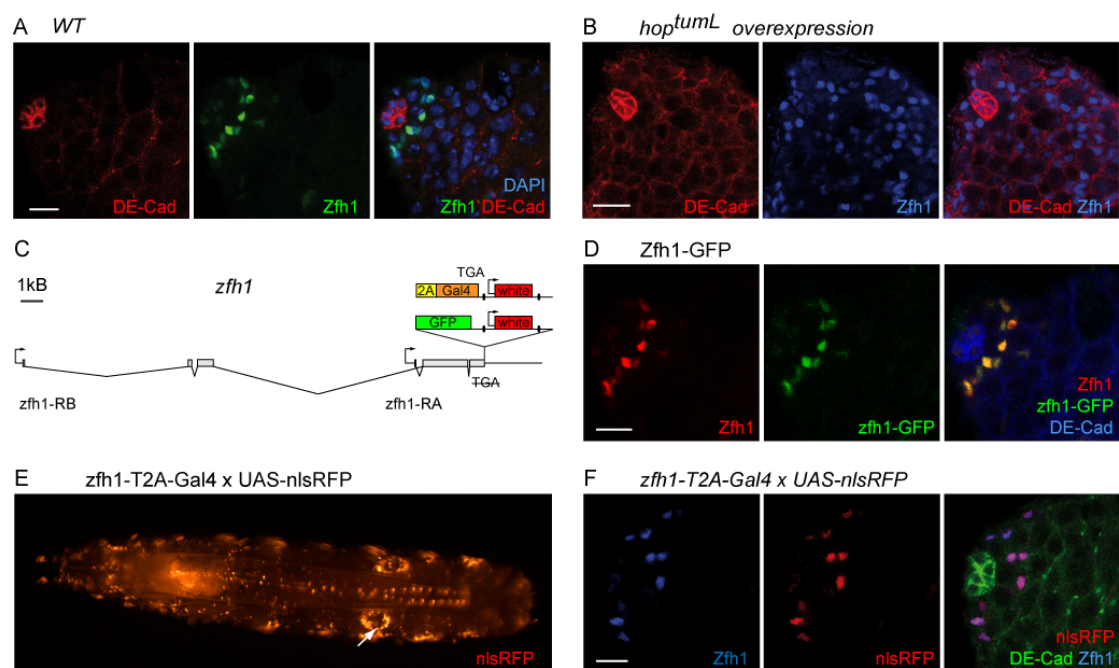

**Figure 1**

## Niche control of stem cell proliferation

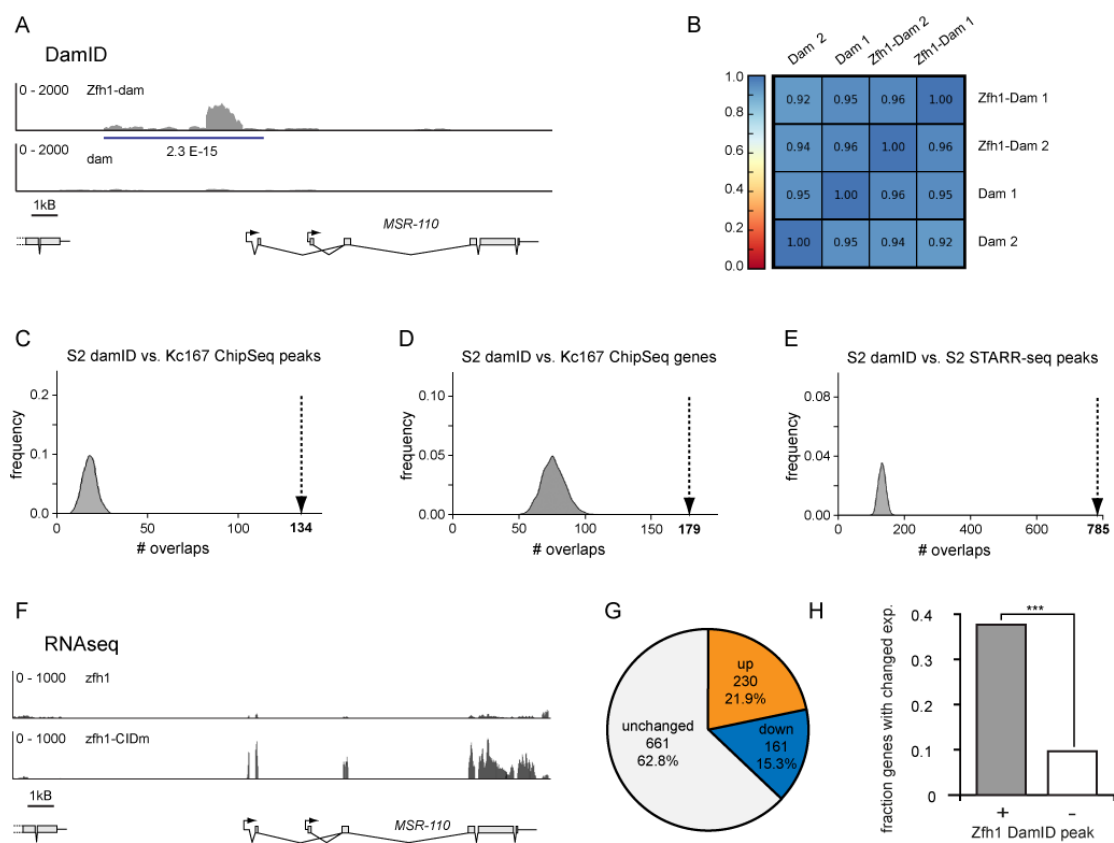

**Figure 2**

## Niche control of stem cell proliferation

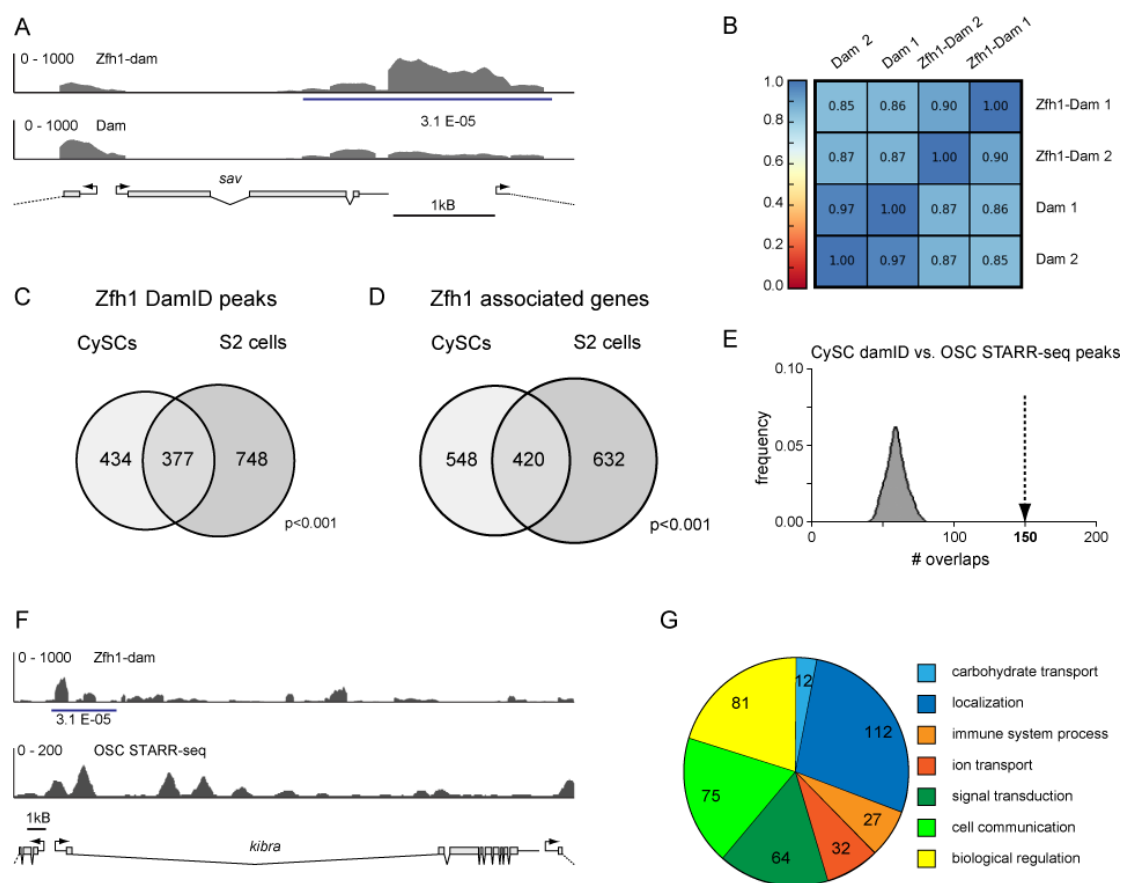

**Figure 3**



## Niche control of stem cell proliferation

### A *Yki* dependent transcription

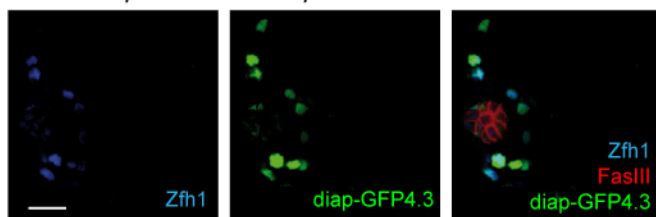

### B *Yki* dependent transcription

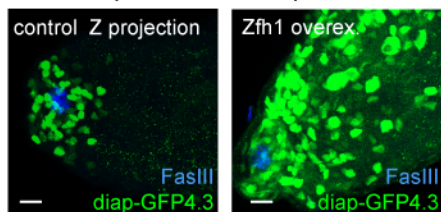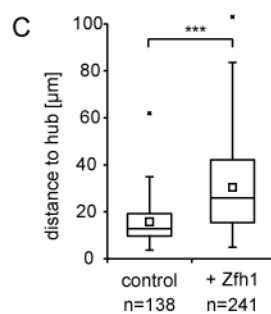

### D MARCM clones 5d ACI

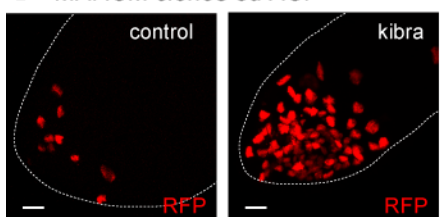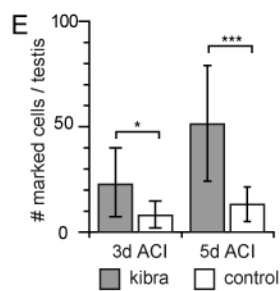

### F *kibra* MARCM clones

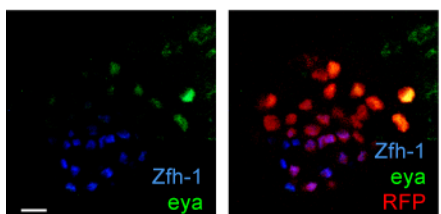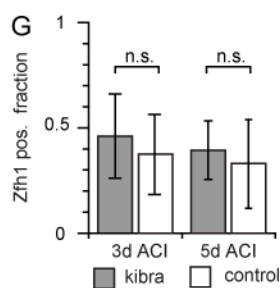

**Figure 4**

## Niche control of stem cell proliferation

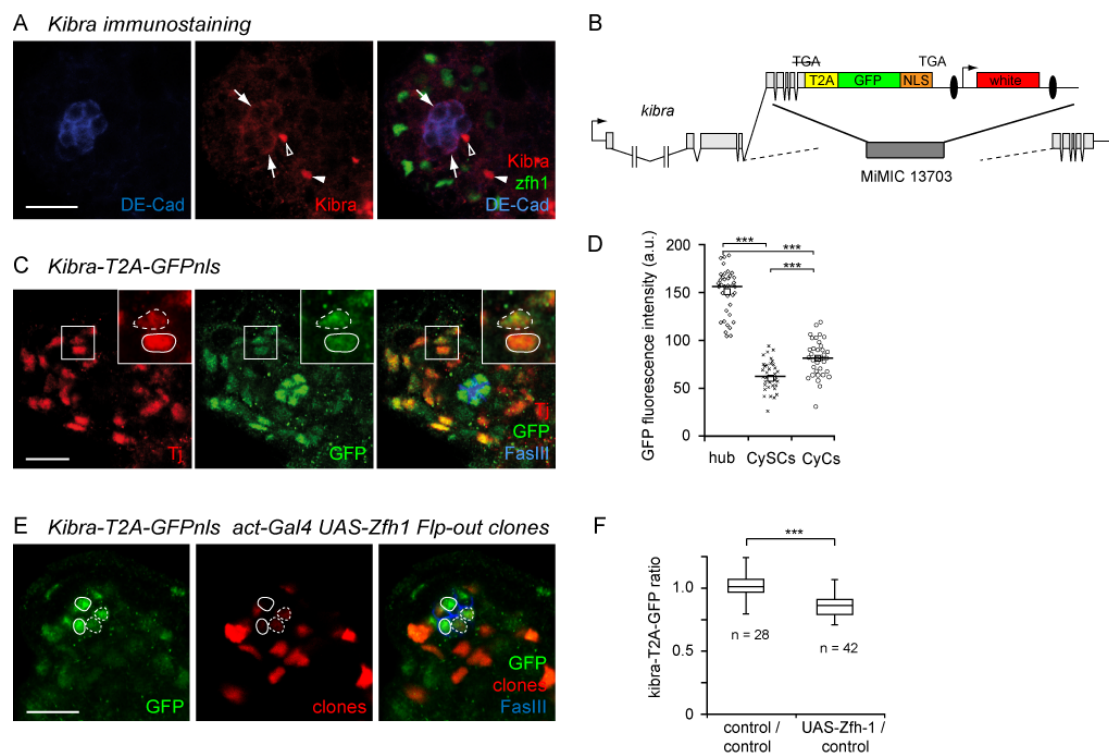

**Figure 5**

## Niche control of stem cell proliferation

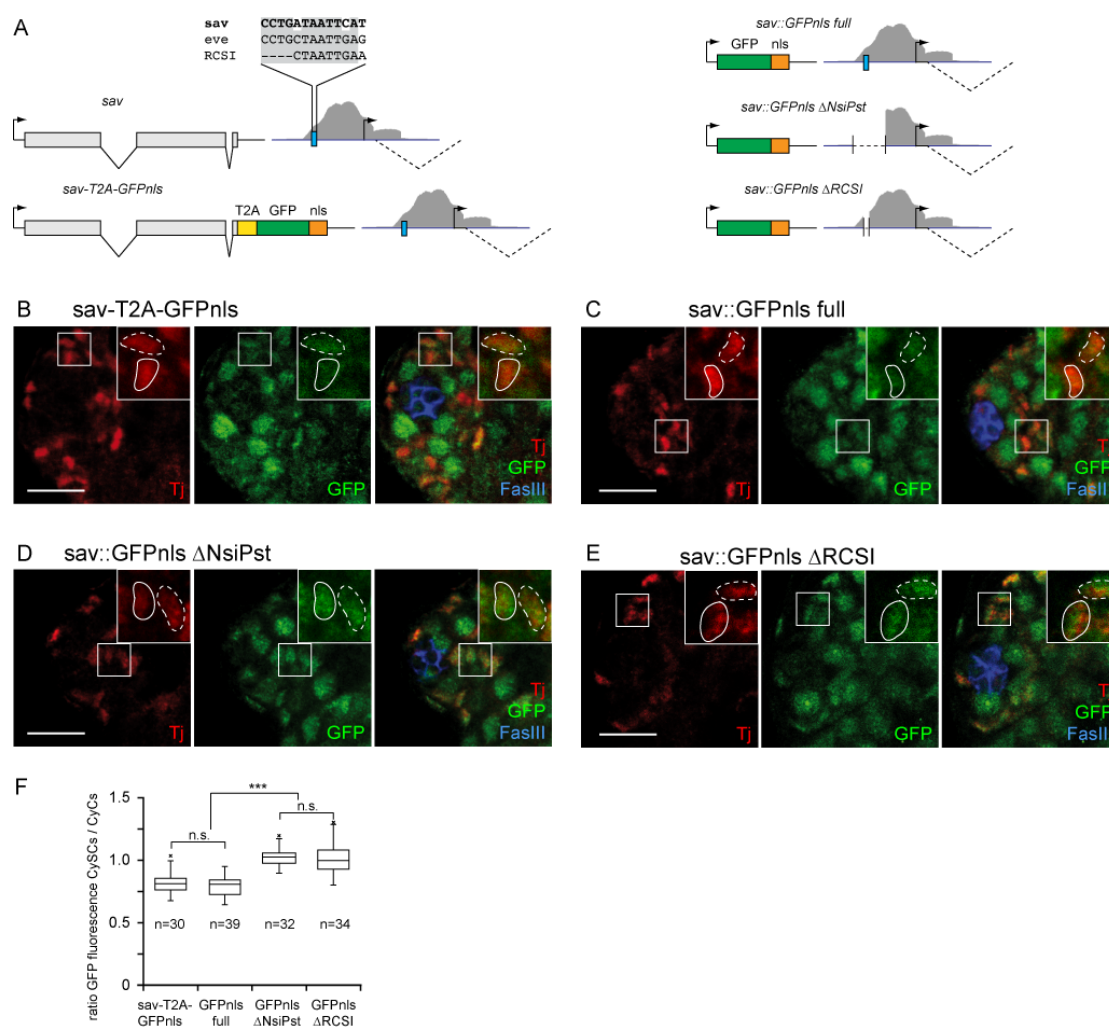

**Figure 6**

## Niche control of stem cell proliferation

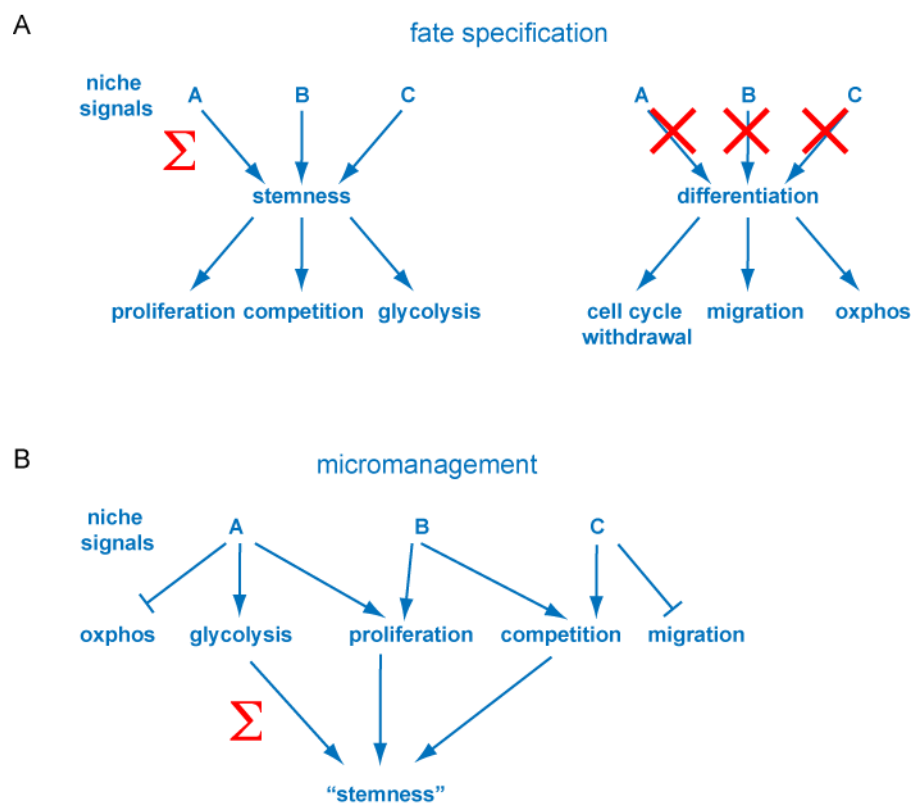

**Figure 7**
